# Supplementary material
Source: Springer Nature journal article supplement (https://www.springermedizin.de/resource/supplementary/12890_2013_563_MOESM1_ESM.pdf/9505324)
Supplement: MOESM1 [file 9505324]

**Additional file 1: Complete list of genes that were up (+) or downregulated (-) in idiopathic pulmonary fibrosis patients, analysed by the cDNA microarrays.**

| Symbol   | UniGene   | RefSeq    | 2-ΔCt |         | Fold        | Description                                            |
|----------|-----------|-----------|-------|---------|-------------|--------------------------------------------------------|
|          |           |           | IPF   | Control | IPF/control |                                                        |
| ADAMTS1  | Hs.643357 | NM_006988 | 0,06  | 0,06    | -1,16       | ADAM metalloproteinase thrombospondin type 1, 1        |
| ADAMTS13 | Hs.131433 | NM_139025 | 0,00  | 0,00    | -1,08       | ADAM metalloproteinase thrombospondin type 1, 13       |
| ADAMTS8  | Hs.271605 | NM_007037 | 0,02  | 0,02    | -1,20       | ADAM metalloproteinase thrombospondin type 1, 8        |
| CD44     | Hs.502328 | NM_000610 | 0,41  | 0,41    | -1,01       | CD44 molecule (Indian blood group)                     |
| CDH1     | Hs.461086 | NM_004360 | 0,10  | 0,12    | -1,13       | Cadherin 1, type 1, E-cadherin (epithelial)            |
| CTN1     | Hs.143434 | NM_001843 | 0,01  | 0,01    | 1,07        | Contactin 1                                            |
| COL11A1  | Hs.523446 | NM_080629 | 0,00  | 0,00    | -3,37       | Collagen, type XI, alpha 1                             |
| COL12A1  | Hs.101302 | NM_004370 | 0,10  | 0,08    | 1,22        | Collagen, type XII, alpha 1                            |
| COL14A1  | Hs.409662 | NM_021110 | 0,20  | 0,07    | 2,92        | Collagen, type XIV, alpha 1                            |
| COL15A1  | Hs.409034 | NM_001855 | 0,06  | 0,02    | 3,15        | Collagen, type XV, alpha 1                             |
| COL16A1  | Hs.368921 | NM_001856 | 0,03  | 0,03    | 1,21        | Collagen, type XVI, alpha 1                            |
| COL1A1   | Hs.172928 | NM_000088 | 0,54  | 0,29    | 1,88        | Collagen, type I, alpha 1                              |
| COL4A2   | Hs.508716 | NM_001846 | 0,28  | 0,61    | -2,14       | Collagen, type IV, alpha 2                             |
| COL5A1   | Hs.210283 | NM_000093 | 0,08  | 0,06    | 1,50        | Collagen, type V, alpha 1                              |
| COL6A1   | Hs.474053 | NM_001848 | 0,23  | 0,16    | 1,45        | Collagen, type VI, alpha 1                             |
| COL6A2   | Hs.420269 | NM_001849 | 0,15  | 0,10    | 1,46        | Collagen, type VI, alpha 2                             |
| COL7A1   | Hs.476218 | NM_000094 | 0,01  | 0,00    | 5,82        | Collagen, type VII, alpha 1                            |
| COL8A1   | Hs.654548 | NM_001850 | 0,01  | 0,00    | 1,74        | Collagen, type VIII, alpha 1                           |
| VCAN     | Hs.643801 | NM_004385 | 0,05  | 0,02    | 2,13        | Versican                                               |
| CTGF     | Hs.591346 | NM_001901 | 0,13  | 0,28    | -2,08       | Connective tissue growth factor                        |
| CTNNA1   | Hs.534797 | NM_001903 | 0,21  | 0,26    | -1,24       | Catenin (cadherin-associated prot.), alpha 1, 102kDa   |
| CTNNA1   | Hs.476018 | NM_001904 | 0,20  | 0,23    | -1,14       | Catenin (cadherin-associated prot.), beta 1, 88kDa     |
| CTNND1   | Hs.166011 | NM_001331 | 0,15  | 0,26    | -1,71       | Catenin (cadherin-associated prot.), delta 1           |
| CTNND2   | Hs.314543 | NM_001332 | 0,00  | 0,00    | -4,10       | Catenin (cadherin-associated prot.), delta 2           |
| ECM1     | Hs.81071  | NM_004425 | 0,02  | 0,01    | 1,47        | Extracellular matrix protein 1                         |
| FN1      | Hs.203717 | NM_002026 | 2,70  | 2,19    | 1,23        | Fibronectin 1                                          |
| HAS1     | Hs.57697  | NM_001523 | 0,00  | 0,00    | -1,02       | Hyaluronan synthase 1                                  |
| CAM1     | Hs.643447 | NM_000201 | 0,25  | 0,28    | -1,12       | Intercellular adhesion molecule 1                      |
| TGA1     | Hs.644352 | NM_181501 | 0,15  | 0,25    | -1,59       | Integrin, alpha 1                                      |
| TGA2     | Hs.482077 | NM_002203 | 0,02  | 0,02    | 1,25        | Integrin, alpha 2 (CD49B, alpha 2 subunit VLA-2 R)     |
| TGA3     | Hs.265829 | NM_002204 | 0,07  | 0,10    | -1,55       | Integrin, alpha 3 (CD49C, alpha 3 subunit VLA-3R)      |
| TGA4     | Hs.694732 | NM_000885 | 0,05  | 0,04    | 1,16        | Integrin, alpha 4 (CD49D, alpha 4 subunit VLA-4R)      |
| TGA5     | Hs.505654 | NM_002205 | 0,05  | 0,07    | -1,45       | Integrin, alpha 5 (fibronectin receptor, alpha polyp.) |
| TGA6     | Hs.133397 | NM_000210 | 0,11  | 0,17    | -1,63       | Integrin, alpha 6                                      |
| TGA7     | Hs.524484 | NM_002206 | 0,01  | 0,00    | 2,19        | Integrin, alpha 7                                      |
| TGA8     | Hs.171311 | NM_003638 | 0,08  | 0,10    | -1,18       | Integrin, alpha 8                                      |
| TGAL     | Hs.174103 | NM_002209 | 0,02  | 0,02    | -1,01       | Integrin, alpha L                                      |
| TGAM     | Hs.172631 | NM_000632 | 0,02  | 0,02    | 1,43        | Integrin, alpha M                                      |
| TGAV     | Hs.436873 | NM_002210 | 0,10  | 0,13    | -1,27       | Integrin, alpha V                                      |
| TGB1     | Hs.643813 | NM_002211 | 0,47  | 0,54    | -1,13       | Integrin, beta 1                                       |
| TGB2     | Hs.375957 | NM_000211 | 0,22  | 0,29    | -1,27       | Integrin, beta 2                                       |
| TGB3     | Hs.218040 | NM_000212 | 0,01  | 0,00    | 2,12        | Integrin, beta 3                                       |
| TGB4     | Hs.632226 | NM_000213 | 0,02  | 0,02    | 1,17        | Integrin, beta 4                                       |
| TGB5     | Hs.536663 | NM_002213 | 0,08  | 0,07    | 1,05        | Integrin, beta 5                                       |
| KAL1     | Hs.521869 | NM_000216 | 0,08  | 0,15    | -1,72       | Kallmann syndrome 1 sequence                           |
| LAMA1    | Hs.270364 | NM_005559 | 0,00  | 0,00    | 1,36        | Laminin, alpha 1                                       |
| LAMA2    | Hs.200841 | NM_000426 | 0,05  | 0,06    | -1,12       | Laminin, alpha 2                                       |
| LAMA3    | Hs.436367 | NM_000227 | 0,03  | 0,08    | -2,68       | Laminin, alpha 3                                       |
| LAMB1    | Hs.650585 | NM_002291 | 0,11  | 0,15    | -1,27       | Laminin, beta 1                                        |

|        |           |           |      |      |       |                                                       |
|--------|-----------|-----------|------|------|-------|-------------------------------------------------------|
| _AMB3  | Hs.497636 | NM_000228 | 0,04 | 0,04 | 1,00  | Laminin, beta 3                                       |
| _AMC1  | Hs.609663 | NM_002293 | 0,20 | 0,25 | -1,29 | Laminin, gamma 1 (formerly LAMB2)                     |
| VMP1   | Hs.83169  | NM_002421 | 0,06 | 0,00 | 26,62 | Matrix metalloproteinase 1 (interstitial collagenase) |
| VMP10  | Hs.2258   | NM_002425 | 0,01 | 0,00 | 2,26  | Matrix metalloproteinase 10 (stromelysin 2)           |
| VMP11  | Hs.143751 | NM_005940 | 0,01 | 0,01 | 2,51  | Matrix metalloproteinase 11 (stromelysin 3)           |
| VMP12  | Hs.1695   | NM_002426 | 0,01 | 0,00 | 15,66 | Matrix metalloproteinase 12 (macrophage elastase)     |
| VMP13  | Hs.2936   | NM_002427 | 0,01 | 0,00 | 26,33 | Matrix metalloproteinase 13 (collagenase 3)           |
| VMP14  | Hs.2399   | NM_004995 | 0,03 | 0,03 | 1,22  | Matrix metalloproteinase 14 (membrane-inserted)       |
| VMP15  | Hs.80343  | NM_002428 | 0,00 | 0,00 | -1,45 | Matrix metalloproteinase 15 (membrane-inserted)       |
| VMP16  | Hs.546267 | NM_005941 | 0,01 | 0,00 | 3,82  | Matrix metalloproteinase 16 (membrane-inserted)       |
| VMP2   | Hs.513617 | NM_004530 | 0,27 | 0,14 | 2,00  | Matrix metalloproteinase 2 (gelatinase A)             |
| VMP3   | Hs.375129 | NM_002422 | 0,00 | 0,00 | 4,98  | Matrix metalloproteinase 3 (stromelysin 1)            |
| VMP7   | Hs.2256   | NM_002423 | 0,23 | 0,01 | 18,78 | Matrix metalloproteinase 7 (matrilysin, uterine)      |
| VMP8   | Hs.161839 | NM_002424 | 0,00 | 0,00 | 4,72  | Matrix metalloproteinase 8 (neutrophil collagenase)   |
| VMP9   | Hs.297413 | NM_004994 | 0,11 | 0,01 | 8,98  | Matrix metalloproteinase 9 (gelatinase B)             |
| VCAM1  | Hs.503878 | NM_000615 | 0,01 | 0,00 | 2,26  | Neural cell adhesion molecule 1                       |
| PECAM1 | Hs.514412 | NM_000442 | 0,08 | 0,10 | -1,14 | Platelet/endothelial cell adhesion molecule           |
| SELE   | Hs.89546  | NM_000450 | 0,00 | 0,00 | 2,11  | Selectin E                                            |
| SELL   | Hs.82848  | NM_000655 | 0,02 | 0,01 | 1,32  | Selectin L                                            |
| SELP   | Hs.73800  | NM_003005 | 0,03 | 0,04 | -1,11 | Selectin P                                            |
| SGCE   | Hs.371199 | NM_003919 | 0,06 | 0,11 | -1,73 | Sarcoglycan, epsilon                                  |
| SPARC  | Hs.111779 | NM_003118 | 0,74 | 1,05 | -1,41 | Secreted protein, acidic, cysteine-rich (osteonectin) |
| SPG7   | Hs.185597 | NM_003119 | 0,02 | 0,03 | -1,36 | Spastic paraplegia 7                                  |
| SPP1   | Hs.313    | NM_000582 | 0,47 | 0,02 | 31,33 | Secreted phosphoprotein 1                             |
| TGFB1  | Hs.369397 | NM_000358 | 0,19 | 0,10 | 1,92  | Transforming growth factor, beta-induced              |
| THBS1  | Hs.164226 | NM_003246 | 0,10 | 0,08 | 1,28  | Thrombospondin 1                                      |
| THBS2  | Hs.371147 | NM_003247 | 0,10 | 0,06 | 1,64  | Thrombospondin 2                                      |
| THBS3  | Hs.169875 | NM_007112 | 0,01 | 0,00 | 1,49  | Thrombospondin 3                                      |
| TIMP1  | Hs.522632 | NM_003254 | 1,23 | 1,03 | 1,19  | TIMP metalloproteinase inhibitor 1                    |
| TIMP2  | Hs.633514 | NM_003255 | 0,24 | 0,32 | -1,36 | TIMP metalloproteinase inhibitor 2                    |
| TIMP3  | Hs.644633 | NM_000362 | 0,00 | 0,00 | -1,64 | TIMP metalloproteinase inhibitor 3                    |
| CLEC3B | Hs.476092 | NM_003278 | 0,08 | 0,21 | -2,43 | C-type lectin domain family 3, member B               |
| TNC    | Hs.143250 | NM_002160 | 0,24 | 0,06 | 2,88  | Tenascin C                                            |
| VCAM1  | Hs.109225 | NM_001078 | 0,04 | 0,04 | 1,05  | Vascular cell adhesion molecule 1                     |
| VTN    | Hs.2257   | NM_000638 | 0,00 | #N/D | N/A   | Vitronectin                                           |
